# Supplementary figures and images for: A Histone Acetylation Modulator Gene Signature for Classification and Prognosis of Breast Cancer
Source: MDPI journal article supplement (doi:10.3390/curroncol28010091), 2021-02-17

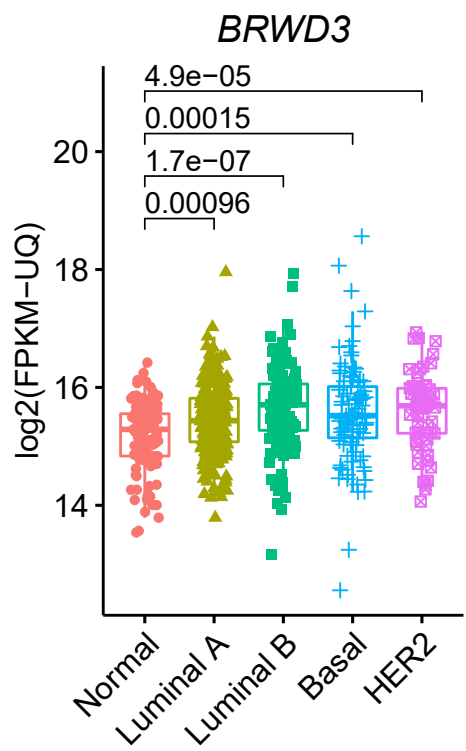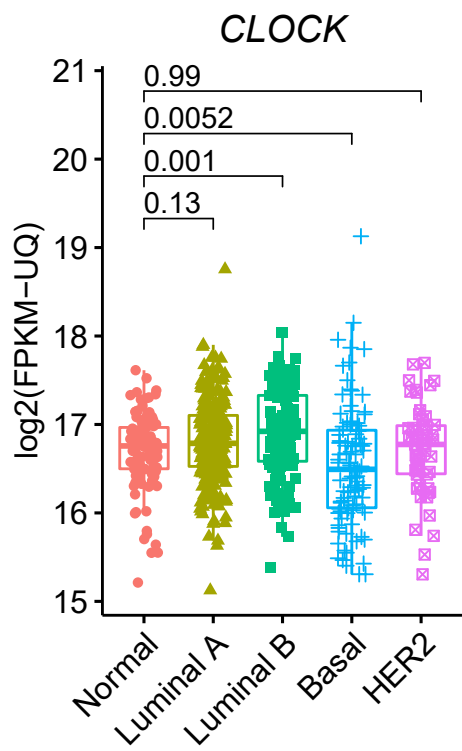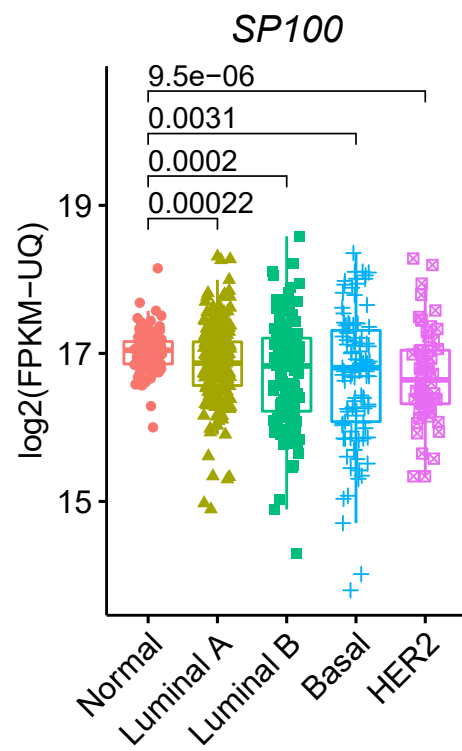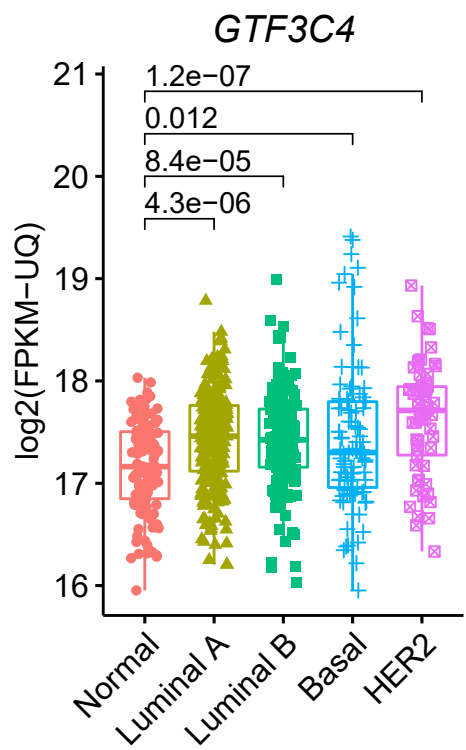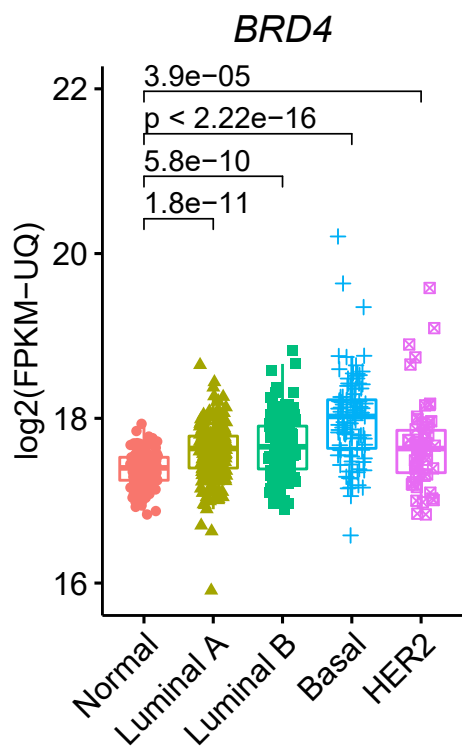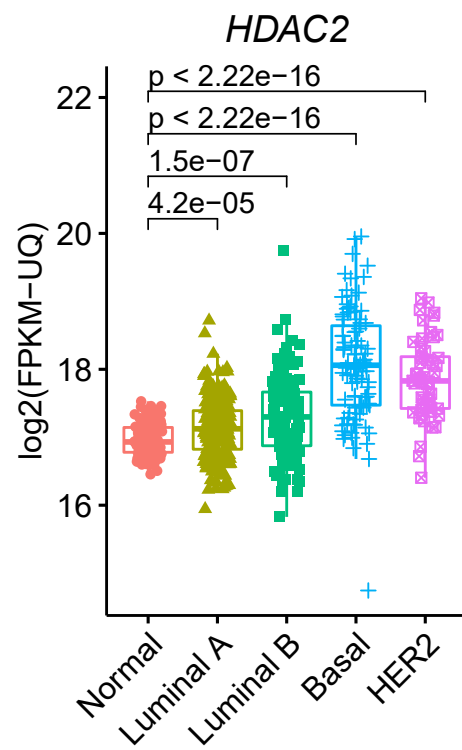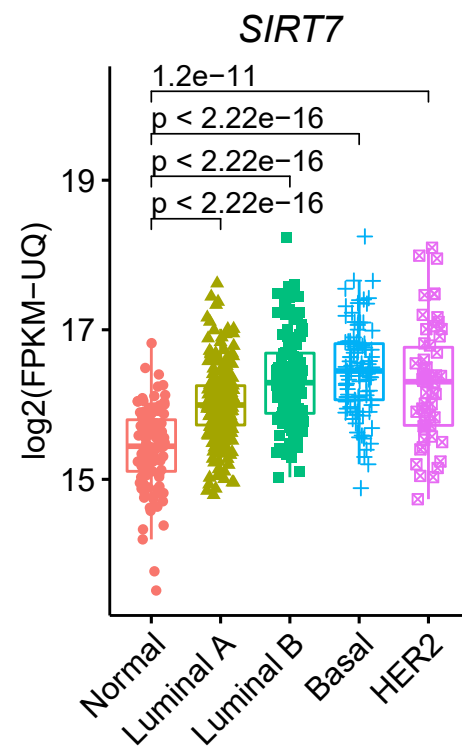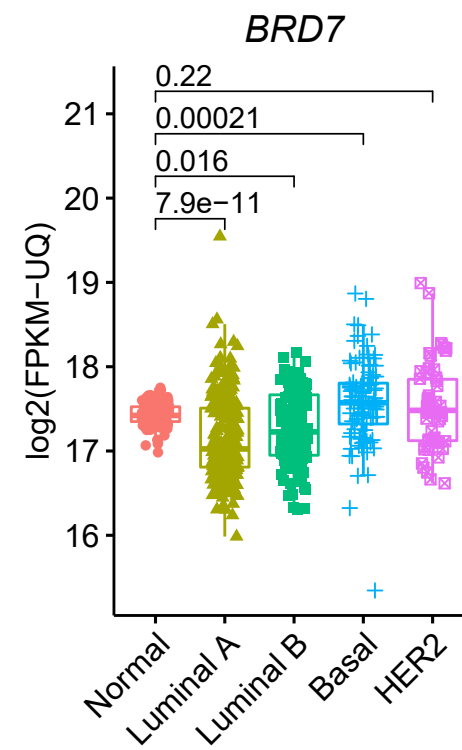

Supplement: s1 [file s1]

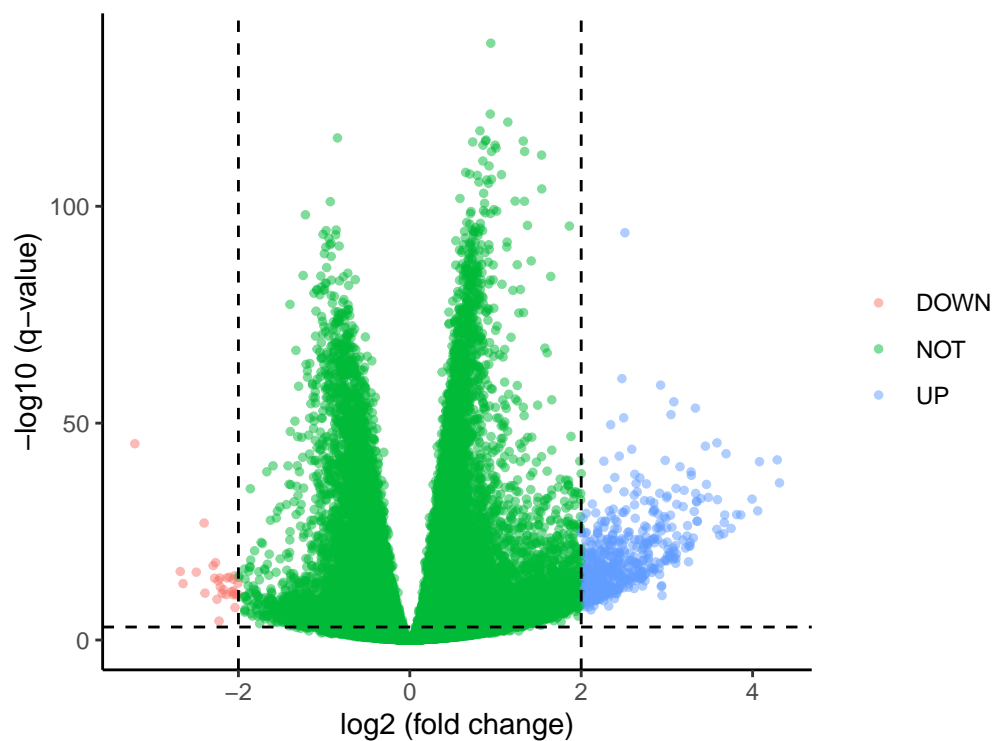

Supplement: s1 [file s1]
